# Supplementary material
Source: PubMed Central journal article supplement (PMC6583075)
Supplement: jama-320-2325-s004.pdf [file jama-320-2325-s004.pdf]

## Supplementary Online Content

The J-David Investigators. Prospective, randomized, open-label, blinded-endpoint trial to examine the effect of active vitamin D on cardiovascular events in hemodialysis patients: Japan Dialysis Active Vitamin D trial (J-DAVID). JAMA. doi:10.1001/jama.2018.17749

### Supplement 4. Data sharing statement

This supplementary material has been provided by the authors to give readers additional information about their work.

### Data Sharing Statement

#### Data

**Data available:** No

#### Additional Information

**Explanation for why data not available:** The data is not ready for data sharing with others now. We are planning to perform sub analyses.
